# Supplementary material
Source: HighWire-hosted journal article supplement (http://ajnr-stage2.highwire.org/highwire/filestream/106726/field_highwire_adjunct_files/0/1014.pdf)
Supplement: 1014.pdf [file 1014.pdf]

## Supplemental Material

**Table 1: MR Technologist Quality Improvement Survey**

| We are evaluating the work-flow and use of vessel wall MR imaging studies at Penn. To improve implementation processes and support the MR technologists, we seek to identify challenges to proactively address.                                                                                                                                                                  |                                                                                                         |
|----------------------------------------------------------------------------------------------------------------------------------------------------------------------------------------------------------------------------------------------------------------------------------------------------------------------------------------------------------------------------------|---------------------------------------------------------------------------------------------------------|
| Question Stem                                                                                                                                                                                                                                                                                                                                                                    | Answer Choices                                                                                          |
| Have you scanned a patient for a Vessel Wall MR imaging exam before?                                                                                                                                                                                                                                                                                                             | Yes<br>No<br>What is that?                                                                              |
| Is it easy to find the specific VWI protocol on the MR console interface?                                                                                                                                                                                                                                                                                                        | Yes<br>No                                                                                               |
| Is it easy to scan a patient ordered for vessel wall MR imaging? (Click all that apply)                                                                                                                                                                                                                                                                                          | Yes- VWI Brain<br>No- VWI Brain<br>Yes- VWI Neck<br>No- VWI Neck                                        |
| If you selected No: What is most challenging about scanning VWI?                                                                                                                                                                                                                                                                                                                 | [Free text]                                                                                             |
| Do you find the online vessel wall MR imaging protocol tipsheets/instructions helpful?                                                                                                                                                                                                                                                                                           | Yes<br>No<br>Where are they online?                                                                     |
| Please provide any feedback on the tipsheets (e.g., length, clarity, what remains unclear)                                                                                                                                                                                                                                                                                       | [Free text]                                                                                             |
| I understand why vessel wall MR imaging exams are ordered and how it adds value to patient care.                                                                                                                                                                                                                                                                                 | Strongly Agree<br>Somewhat Agree<br>Neither Agree or Disagree<br>Somewhat Disagree<br>Strongly Disagree |
| <p>Please share any comments or challenges that can help the MR technologists with the work-flow, understand VWI &amp; encourage engagement for vessel wall MR imaging cases.</p> <p>(For example: identifying VWI cases, protocol selection, scan times, neuroradiologist support, tipsheet availability/clarity, education/understanding clinical indication, scheduling).</p> | [Free text]                                                                                             |

**Table 2: Ordering Clinician Quality Improvement Survey**

| We are evaluating the use and usefulness of vessel wall MR imaging studies at Penn. To improve implementation processes and facilitate end-user gains, we seek to identify barriers to proactively address.                                                                                         |                                                                                                         |
|-----------------------------------------------------------------------------------------------------------------------------------------------------------------------------------------------------------------------------------------------------------------------------------------------------|---------------------------------------------------------------------------------------------------------|
| Question Stem                                                                                                                                                                                                                                                                                       | Answer Choices                                                                                          |
| Have you ordered a vessel wall MR imaging exam before?                                                                                                                                                                                                                                              | Yes<br>No<br>What is that?                                                                              |
| Do you find it easy to order a vessel wall MR imaging exam?                                                                                                                                                                                                                                         | Yes<br>No<br>I do not know how to order a vessel wall MR imaging exam.                                  |
| Vessel wall MR imaging has changed and helped my clinical diagnostic confidence for diagnosing and managing my patients                                                                                                                                                                             | Strongly Agree<br>Somewhat Agree<br>Neither Agree or Disagree<br>Somewhat Disagree<br>Strongly Disagree |
| Please share any comments that may help you order or use vessel wall MR imaging for your patients.<br><br>(For example: exam name/type (brain, neck), EPIC interface, how to order, when to order/indications, interpretations, available imaging sites for inpatients vs outpatients, scheduling). | [Free text]                                                                                             |
